# Supplementary material for: 高校生を志願者に変えるSNS活用事例 (小特集 オープンキャンパスのこれから)
Source: Royal Society of Chemistry journal article supplement (doi:10.1039/c9ra09225k), 2014-01-01
Supplement: c9ra09225k1.pdf [file c9ra09225k1.pdf]

Standard curve of standard sample:

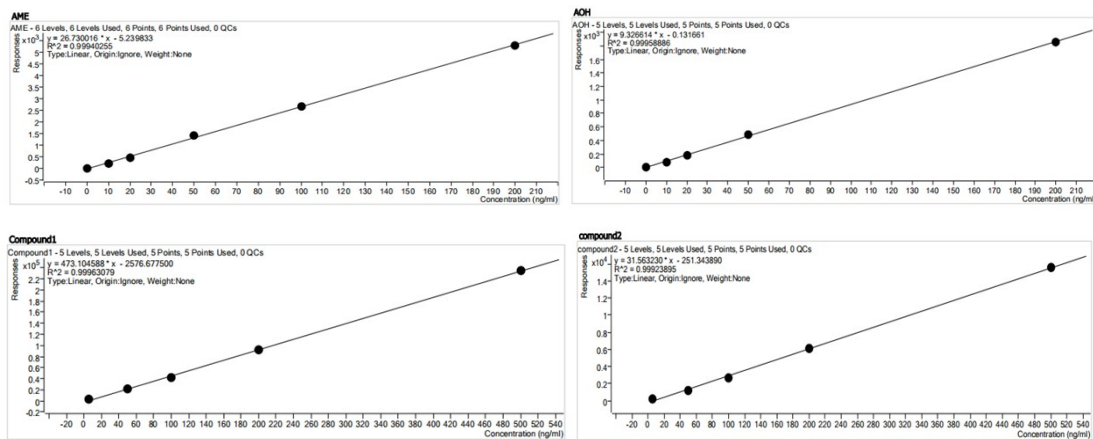

Fig. S1 Standard curve for standard samples of AME, AOH, ALT and TEN toxin

# HPLC/MS chromatograms and mass spectra

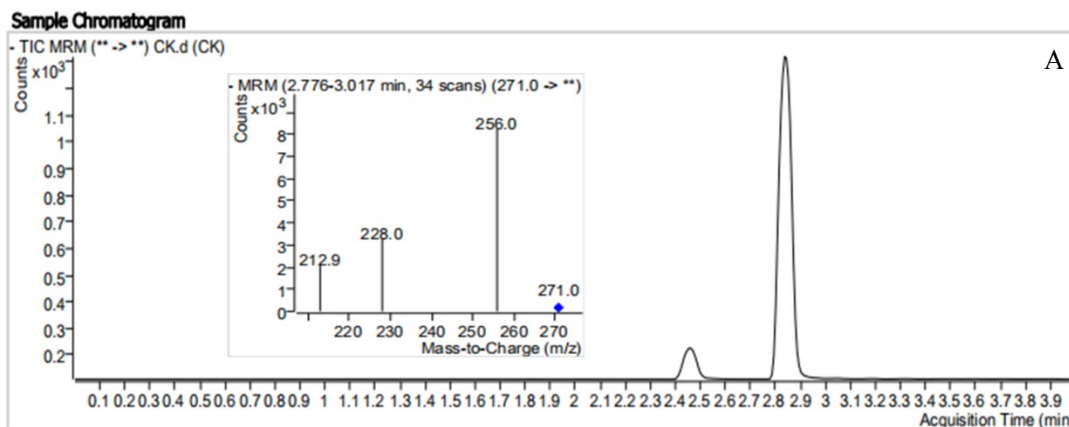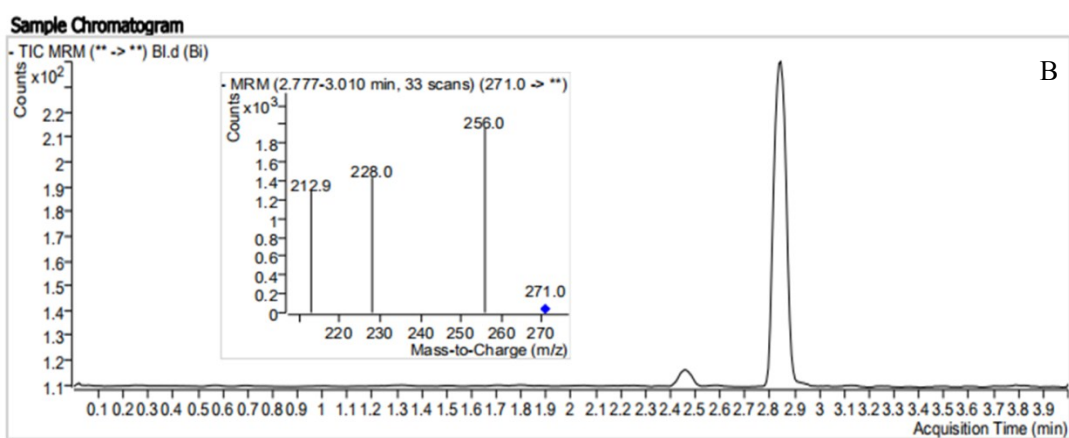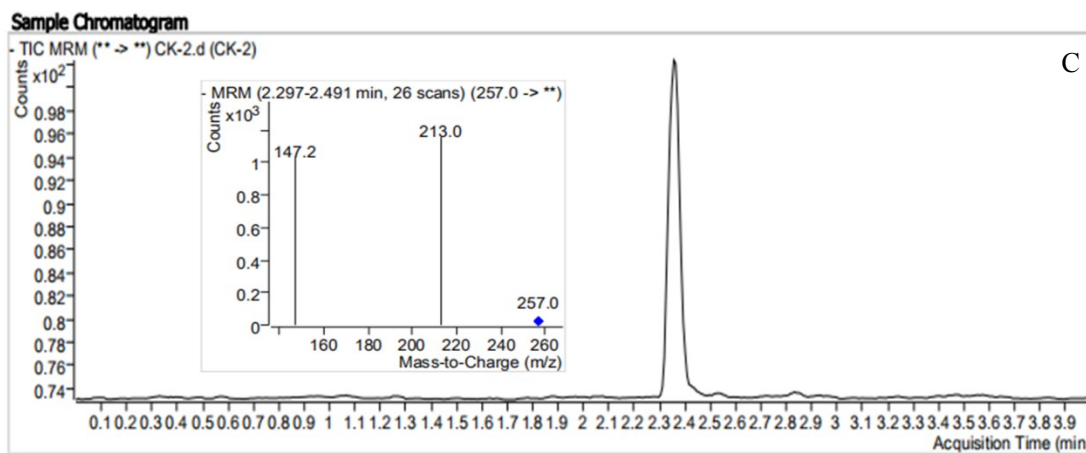

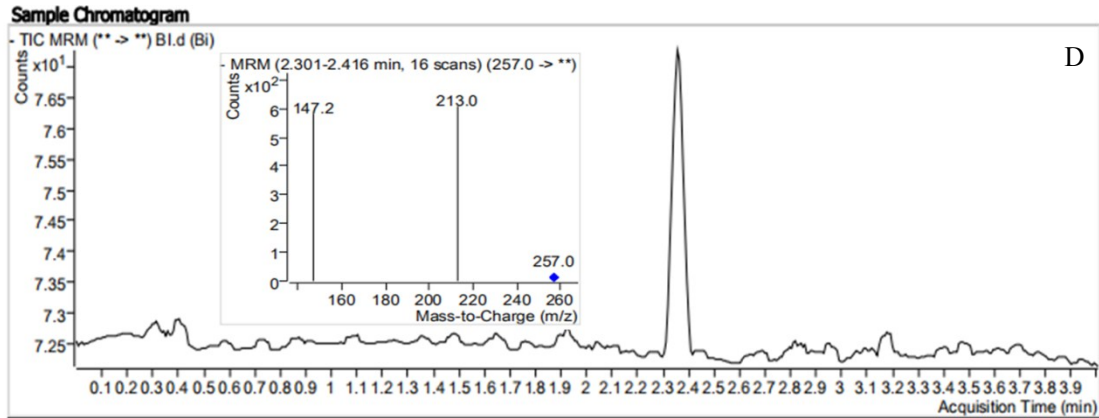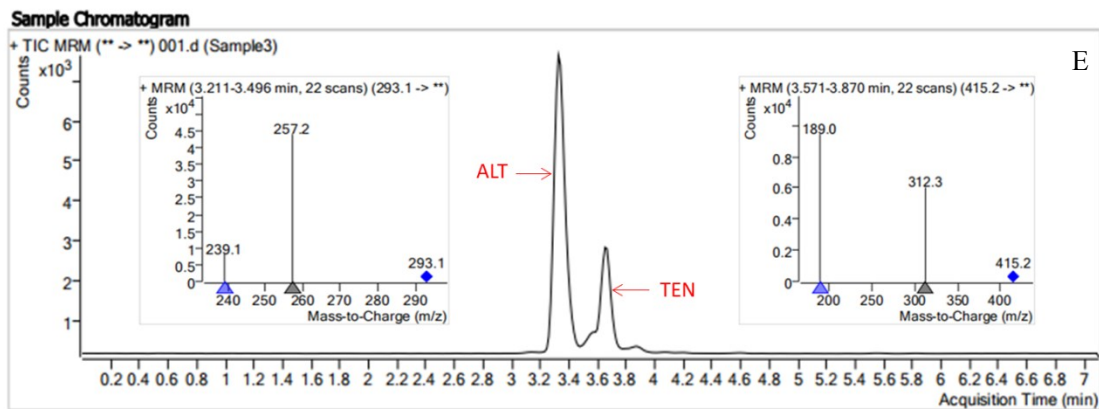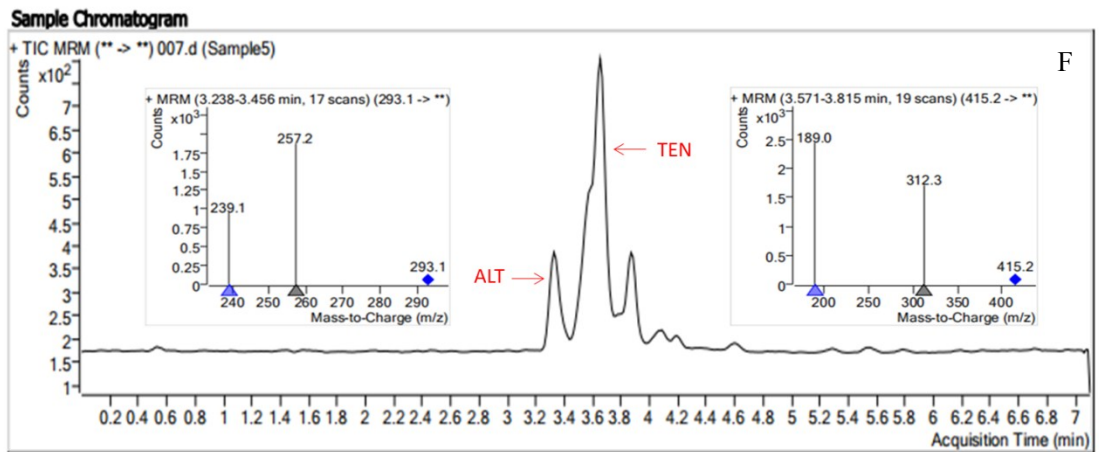

Fig. S2 HPLC/MS chromatograms and Mass spectra for AME (A, B) and AOH (C, D) in *A. alternata* treated with 0 and 0.312 mM BITC. (E) is HPLC/MS chromatograms and Mass spectra for AME and TEN in *A. alternata* treated with 0 mM BITC. (F) is HPLC/MS chromatograms and Mass spectra for AME and TEN in *A. alternata* treated with 0.312 mM BITC.
